# Supplementary material for: Bioimpedance-Derived Membrane Capacitance: Clinically Relevant Sources of Variability, Precision, and Reliability
Source: MDPI journal article supplement (doi:10.3390/ijerph20010686), 2022-12-30
Supplement: s1 [file s1]

**Supplemental Table S1.** Stepwise Selection of Sources of Variability in Membrane Capacitance ( $C_M$ ) – Including Bioimpedance Estimates of Body Water and Hydration

Model:  $F(12,38) = 63.54$ ,  $p < 0.0001$ ;  $R^2 = 0.97$ ; Adjusted  $R^2 = 0.95$

| Outcome Variable: $C_M$ |                             |                          |               |             |            |        | Final Model Effects |        |
|-------------------------|-----------------------------|--------------------------|---------------|-------------|------------|--------|---------------------|--------|
| Step                    | Variable Added              | Variable Removed         | Partial $R^2$ | Model $R^2$ | $F$ Change | P      | STD- $\beta$        | P      |
| 1                       | ECW:ICW ratio               |                          | 0.59          | 0.59        | 52.58      | <.0001 | -0.70               | <.0001 |
| 2                       | DXA arm lean mass, kg       |                          | 0.24          | 0.82        | 47.75      | <.0001 |                     |        |
| 3                       | Dietary energy intake, kcal |                          | 0.03          | 0.86        | 8.44       | 0.0063 | -0.09               | 0.0333 |
| 4                       | HOMA-IR                     |                          | 0.03          | 0.88        | 7.80       | 0.0085 | 2.47                | 0.0001 |
| 5                       | Insulin, fasting, uU/ml     |                          | 0.01          | 0.89        | 3.34       | 0.0769 | -2.09               | 0.0005 |
| 6                       | Waist circumference, cm     |                          | 0.01          | 0.91        | 3.69       | 0.0638 | 0.45                | 0.0081 |
| 7                       | Glucose, fasting, mg/dl     |                          | 0.03          | 0.93        | 12.30      | 0.0014 | -0.55               | 0.0087 |
| 8                       | Skin temperature, °F        |                          | 0.01          | 0.94        | 4.39       | 0.0446 | -0.14               | 0.0191 |
| 9                       |                             | DXA Arm Lean Mass, kg    | 0.00          | 0.94        | 1.83       | 0.1860 |                     |        |
| 10                      | Potassium, serum, mmol/l    |                          | 0.01          | 0.95        | 5.13       | 0.0309 |                     |        |
| 11                      | Thigh circumference, cm     |                          | 0.01          | 0.95        | 2.99       | 0.0942 | 0.06                | 0.1057 |
| 12                      | Visceral fat mass, g        |                          | 0.01          | 0.96        | 3.50       | 0.0719 | -0.32               | 0.0099 |
| 13                      | Leg length, cm              |                          | 0.00          | 0.96        | 3.40       | 0.0763 | 0.14                | 0.0024 |
| 14                      |                             | Potassium, serum, mmol/l | 0.00          | 0.96        | 0.65       | 0.4262 |                     |        |
| 15                      | Race/ethnicity              |                          | 0.00          | 0.96        | 2.57       | 0.1208 | 0.08                | 0.0813 |
| 16                      | Progesterone, ng/ml         |                          | 0.00          | 0.97        | 2.29       | 0.1420 | 0.07                | 0.0877 |
| 17                      | Dietary fat intake, g       |                          | 0.00          | 0.97        | 2.46       | 0.1293 | 0.26                | 0.1293 |

Grey-filled boxes –variable was not included in the final model.

Abbreviations: STD- $\beta$  – standardized beta coefficient; ECW: ICW ratio – extracellular to intracellular water ratio (i.e., hydration status); DXA– dual-x-ray absorptiometry.
